# Supplementary material
Source: publisher site journal article supplement (https://www.dovepress.com/article/353757)

## SUPPLEMENTARY FIGURE LEGENDS

Supplementary Figure 1: Structures of semi-synthetic glycosaminoglycan ethers (SAGEs) (a) Alkylation of Hyaluronan combined with (b) Sulfation of Heparin leading to evolution of (c) SAGE

Supplementary Figure 2: Schema describing the longitudinal protocol

Supplementary Figure 3: (A) The effects of locally administered SAGE or control on Clinical attachment loss (CAL) in dogs during a 12-week protocol. Grey bar: Control group; black bar: SAGE treatment group. CAL in posterior tooth sites were monitored at 4,8 and 12 weeks. Each value represents the mean (100–144 sites/per group)  $\pm$  S.E.M. ####Indicates  $p < 0.001$ , values at each time period compared to baseline; \*\*\*Indicates  $p < 0.001$ , values compared to control at each time period. (B) Number of pockets with PD  $\geq$  4mm were measured for baseline, 4 8, and 12 – week time period. Each value represents the mean (30–238 sites/per group)  $\pm$  S.E.M. #Indicates  $p < 0.05$ , values at each time period compared to its own baseline; \*Indicates  $p < 0.05$ , values compared to control at each time period.

Supplementary Figure 4: The effects of locally administered SAGE or control on cell-signaling molecules in gingival extracts were measured by Western blot at 12 weeks. Grey bar: Control group; black bar: SAGE treatment group. Each value represents the mean (n=3 samples/group)  $\pm$  S.E.M. (A) ERK1/2 in gingival extracts. compared to control at 12 weeks. (B) p38 MAPK in gingival extracts compared to control at 12 weeks

# SUPPLEMENTARY FIGURES

## Supplementary Figure -1

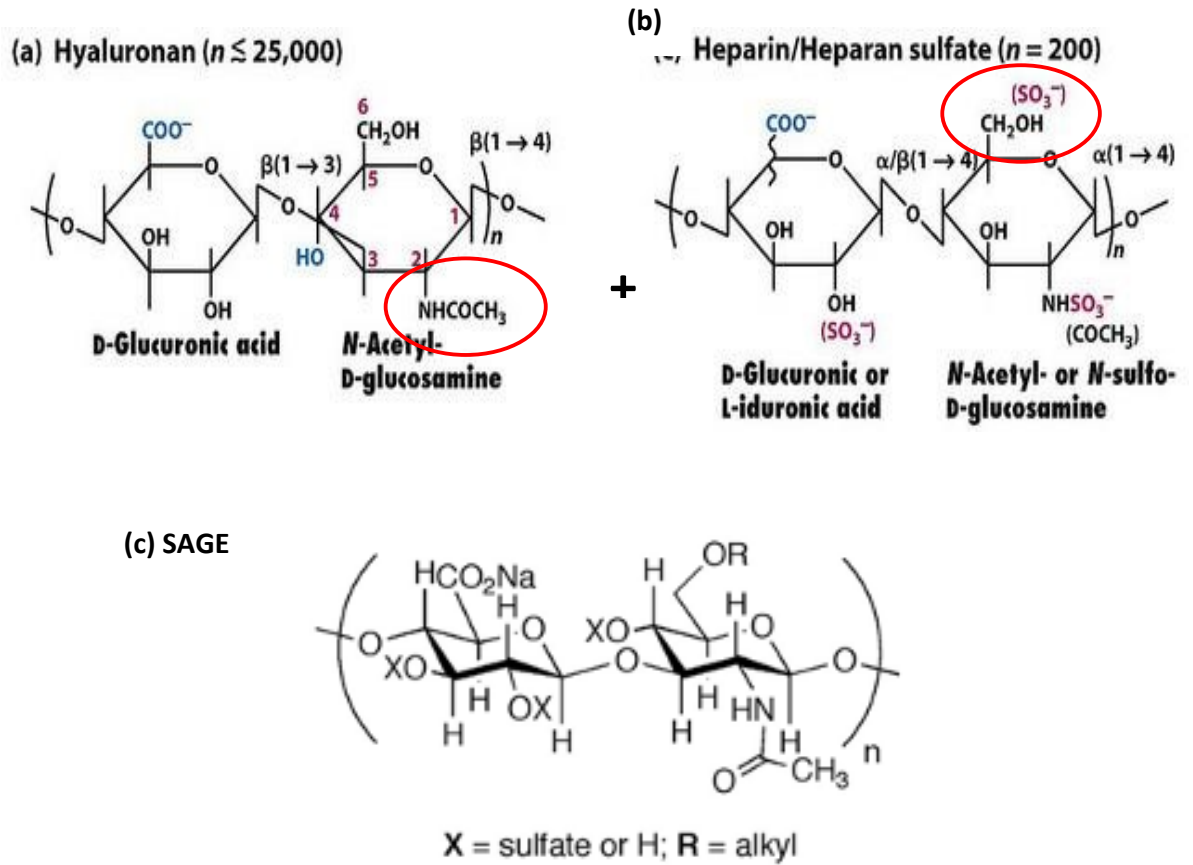

(a) Chemically modified metabolically stable HA + (b) Anti-inflammatory property of Heparin = (c) SAGE

# Supplementary Figure -2

## Study design timeline: 4 Time Points

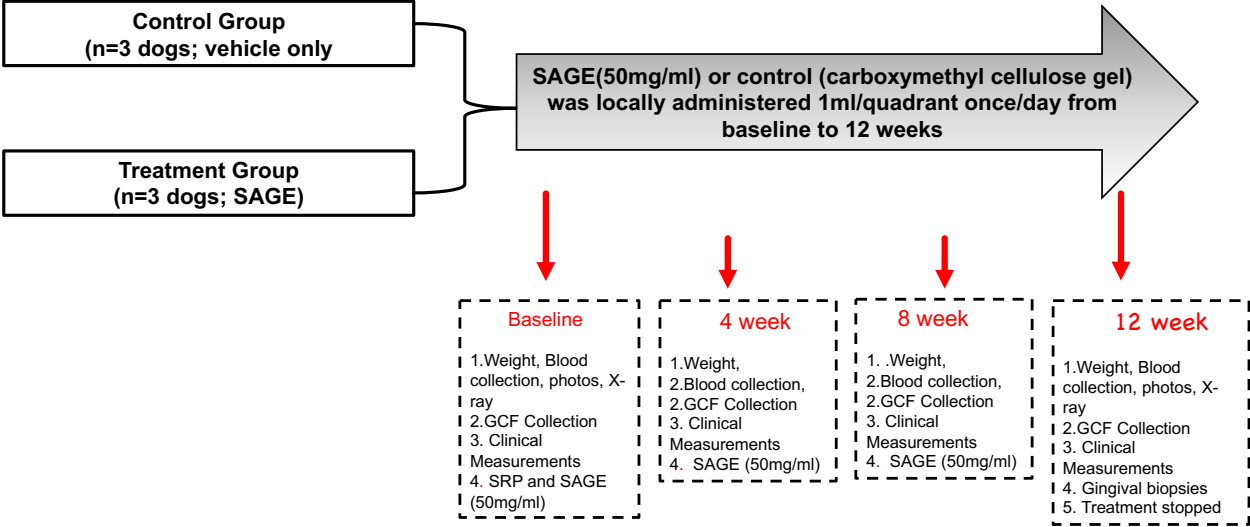

## Supplementary Figure -3

A

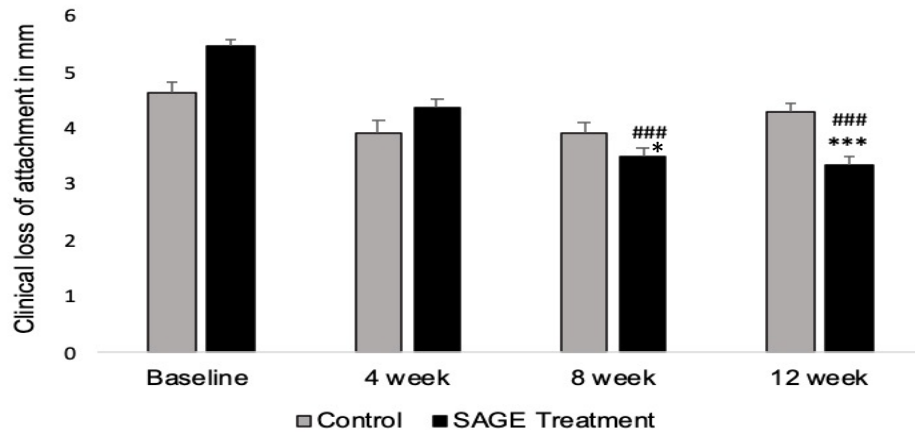

B

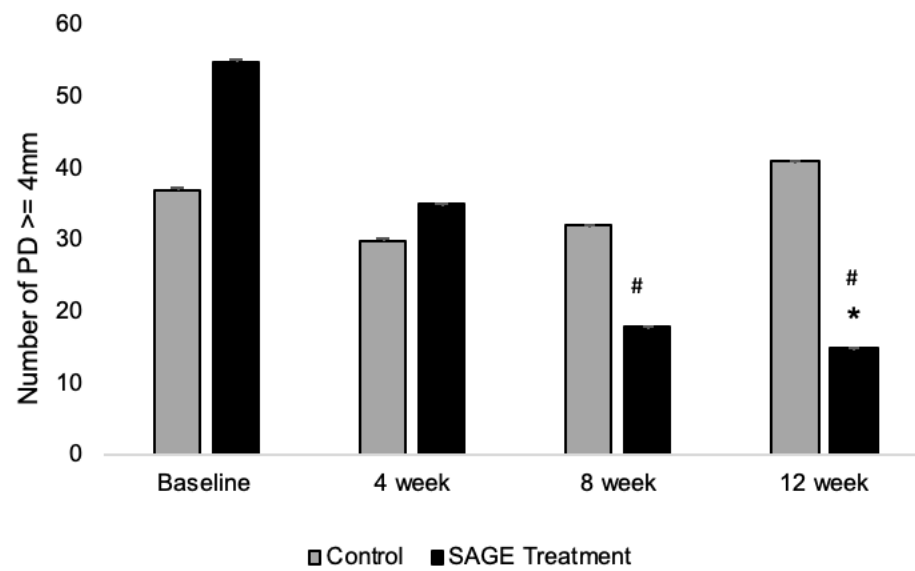

# Supplementary Figure - 4

**A**

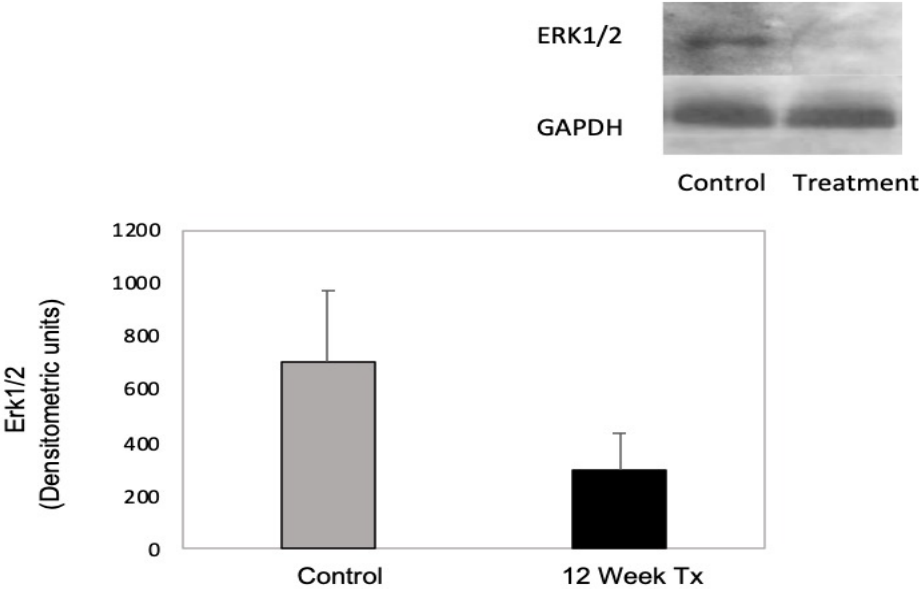

**B**

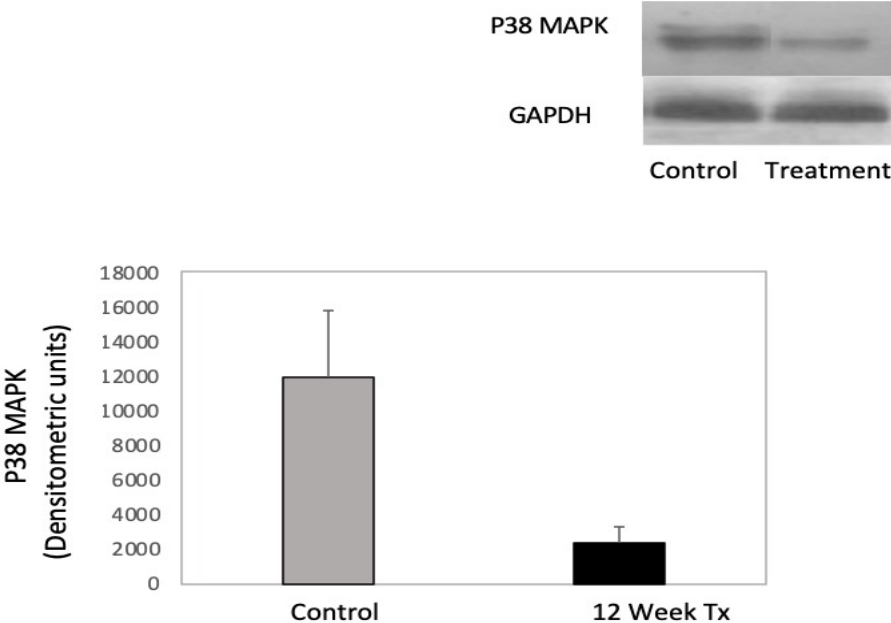

Supplement: Supplementary file 1 [file get_supplementary_file.php]
